# Supplementary material
Source: PubMed Central journal article supplement (PMC6386677)
Supplement: pnas.1813801116.sapp.pdf [file pnas.1813801116.sapp.pdf]

# Supporting Information for “Structural hierarchy confers error tolerance in biological materials”

Jonathan Michel<sup>a</sup> and Peter J. Yunker<sup>a,2</sup>

<sup>a</sup>Georgia Institute of Technology, School of Physics, Atlanta GA USA

## Supporting Information (SI)

**Finding the critical bond portions.** Critical bond portions for a network with  $N$  levels are computed from simulation data for each level by choosing all points in bond portion space for which the network is fully connected on the other  $N - 1$  levels, and the stiffness is non-zero. For one and two levels, we then fit a plot of stiffness vs. the bond portion of interest to an equation of the form of Eq. 1 from the main text. For one-level networks, we sampled bond portions from 0.6 to 1.0 in increments of 0.2. For two level networks, we sampled bond portion space from 0.55 to 1.0 in increments of 0.05 along both the large-scale and small-scale directions. Owing to the computational expense of simulated three-level networks, we sampled bond portion space from 0.8 to 1.0 in increments of 0.1 for all levels. As 0.8 appeared to be below the critical bond portion for the small scale, we also simulated a network with bond portions of 1.0, 1.0 and 0.85 on the large, medium, and small scales, respectively, so as to have at least three points above the threshold of vanishing stiffness. From here, data for stiffness vs. bond portion for three level networks were fit to a line of the form

$$K(p) = a \cdot p + k_0 \quad [S13]$$

and the x-intercept of this line was taken to be the critical bond portion. Our analysis is shown schematically in Fig. S1.

**Analytical prediction of hierarchical robustness.** First, we consider a nominal point far from any boundary in bond portion space. For  $N$  levels, we define an excess bond portion  $p_{e,i}$  for each level, with  $1 \leq i \leq N$ :

$$p_{e,i} = p_i - p_{c,i} \quad [S14]$$

Now let the deviation from the nominal excess bond on the  $i$ th level be  $\delta_i$ , with each  $\delta_i$  identically and independently distributed according to a distribution  $\mathcal{P}_i$  with zero mean and standard deviation  $\sigma_i$ , such that the total probability distribution function for a set of displacements  $\{\delta_1, \dots, \delta_N\}$  is

$$\mathcal{P} = \prod_{i=1}^N \mathcal{P}_i(\delta_i) \quad [S15]$$

Referring to Eq. 4 in the main text, we define the reduced stiffness

$$\bar{K} = \frac{K}{k \prod_{i=1}^N (1 - p_{c,i})} \quad [S16]$$

With this definition we now find the expected deviation in the stiffness of a network with  $N$  hierarchical levels. The mean of  $\bar{K}$  is

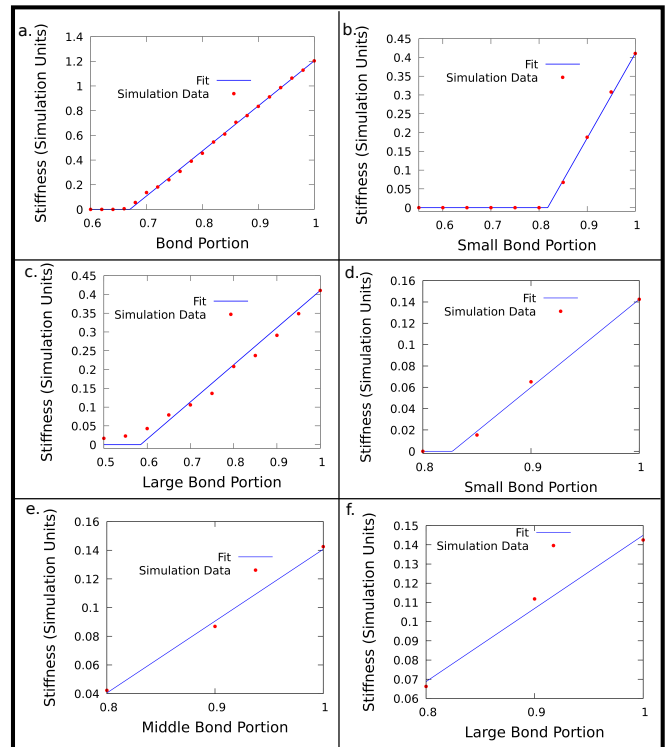

**Fig. S1.** Panel **a** illustrates the determination of the critical bond portion for one level. Panels **b** and **c** demonstrate the determination of the critical bond portion for the large and small-scale critical connectivities for the two-level case, and panels **d-e** illustrate determination of critical connectivity for the large, medium and small scales for the three-level case.

$$\langle \bar{K} \rangle = \int \cdots \int \left( \prod_{i=1}^N (p_{e,i} + \delta_i) \right) \mathcal{P}(\delta_1, \dots, \delta_N) d\delta_1 \cdots d\delta_N \quad [S17]$$

$$= \prod_{i=1}^N p_{e,i} \quad [S18]$$

42 while the mean square stiffness is

$$\langle \bar{K}^2 \rangle = \int \cdots \int \left( \prod_{i=1}^N (\delta_i + p_{e,i})^2 \right) \mathcal{P}(\delta_1, \dots, \delta_N) d\delta_1 \cdots d\delta_N \quad [S19]$$

$$= \prod_{i=1}^N (\sigma_i^2 + p_{e,i}^2) \quad [S20]$$

43 The standard deviation in stiffness is then

$$\Delta \bar{K} = \sqrt{\prod_{i=1}^N (\sigma_i^2 + p_{e,i}^2) - \prod_{i=1}^N p_{e,i}^2} \quad [S21]$$

Here it has been assumed that  $p_{e,i} \gg \sigma_i$  for all  $i$ , so integration can be carried out with the assumption that Eq. 4 in the main text holds for all values  $\delta_i$  that contribute appreciably to the integral. In the special case in which the excess bond portion is the same on each length scale, and each bond portion has the same standard deviation, Eq. (S21) reduces to

$$\sqrt{(\sigma^2 + p_e^2)^N - p_e^{2N}}$$

45 , with  $p_e = \bar{K}^{1/N}$ . The relative error in stiffness then scales  
46 with  $N$  as

$$\frac{\Delta \bar{K}}{\bar{K}} = \frac{\sqrt{(\sigma^2 + p_e^2)^N - p_e^{2N}}}{p_e^N} \quad [S22]$$

$$= \sqrt{\left(1 + \frac{\sigma^2}{p_e^2}\right)^N - 1} \quad [S23]$$

$$\approx \frac{\sqrt{N}\sigma}{p_e} \quad [S24]$$

47 or

$$\frac{\Delta \bar{K}}{\bar{K}} \approx \frac{\sqrt{N}\sigma}{\bar{K}^{1/N}} \quad [S25]$$

48 where the last approximation holds when  $\sigma \ll p_e$ . For a  
49 target  $\bar{K}$ , this functional form predicts the optimal number of  
50 levels to be  
51

$$N^* = \lfloor -2 \ln(\bar{K}) \rfloor \quad [S26]$$

**Accounting for Other Types of Error Distributions.** As men-  
tioned in the main text, we also accounted for two additional  
classes of distributions of random errors in assembly. In the  
first case, we still presume the errors to be independent on  
each scale and normally distributed, but we allow the standard  
deviation of error in bond portion at the smallest length scale  
to be different from the standard deviation for all other scales.  
For an  $N$ -level network, suppose  $N - 1$  levels exhibit random  
errors with standard deviation  $\sigma_a$ , while the remaining level  
exhibits random errors in bond portion with standard deviation  
 $\sigma_b$ . In this case, the probability distribution function for the  
 $N$ -dimensional vector of errors,  $\vec{\delta}$ , should take the form

$$\mathcal{P}(\vec{\delta}) = \frac{1}{(2\pi)^{2/N} \sigma_a^{N-1} \sigma_b} \exp \left\{ -\frac{1}{2\sigma_a^2} \prod_{i \neq 2} \delta_i^2 - \frac{\delta_2^2}{2\sigma_b^2} \right\} \quad [S27]$$

We consider once more a point in bond portion space with  
the same excess bond portion on each level, and that this  
excess bond portion is much greater than either  $\sigma_a$  or  $\sigma_b$ . A  
straightforward modification to the above derivation for a  
constant standard deviation yields

$$\frac{\bar{K}}{\Delta \bar{K}} = \sqrt{\frac{\sigma_b^2}{\bar{K}^{2/N}} + (N-1) \frac{\sigma_a^2}{\bar{K}^{2/N}} + (N-1) \frac{\sigma_a^2 \sigma_b^2}{\bar{K}^{4/N}}} \quad [S28]$$

We consider the greatest value for  $\sigma_b$  for an  $N$ -level network  
such that the relative variation in stiffness is no greater than  
the relative deviation in stiffness for a single-level network  
with a bond portion distribution of width  $\sigma_a$ . Equating the  
right-hand sides of Eq. (S25) and Eq. (S28) yields

$$\frac{\sigma_b}{\sigma_a} = \bar{K}^{2/N} \sqrt{\frac{1}{\bar{K}^2} - \frac{N-1}{\bar{K}^{2/N}}} \sqrt{\frac{1}{\bar{K}^{2/N} + (N-1)\sigma_a^2}} \quad [S29]$$

We show this behavior for the case in which the product  
of excess bond portions is fixed at 0.1, and at all levels of  
structure but the second, the standard deviation of the error  
in bond portion is 0.001 (Fig. S2a). The ratio of the maximum  
standard deviation on the second level such that the overall  
relative variation in stiffness remains less than or equal to that  
for a one-level network is plotted vs. the number of levels of  
hierarchy.

We can use the foregoing discussion to explore the marginal  
benefit of adding another level of hierarchy, by first considering  
a lattice with  $N - 1$  levels of structure, each of which has an  
identical distribution of bond portions with standard deviation  
 $\sigma_a$ . If this lattice, in turn, is used to construct each large-  
scale bond in an  $N$ -level lattice, we may identify the largest  
standard deviation of bond portion,  $\sigma_N$ , on the large scale  
such that the relative fluctuation in stiffness of the overall  
structure is not increased by the addition of another level.  
Note first that Eq. (S28) gives the relative fluctuation for the  
 $N$ -level lattice when  $\sigma_b$  is replaced by  $\sigma_N$ . Equating this result  
to formula Eq. (S25), applied to an  $N - 1$ -level lattice, yields

$$\frac{\sigma_N}{\sigma_a} = \sqrt{\frac{(N-1) (\bar{K}^{2/N(N-1)} - 1)}{1 + (N-1)\sigma_a^2 \bar{K}^{-2/N}}} \quad [S30]$$

We show this behavior in Fig. S2b for the case  $\bar{K} = 0.1$ ,  
 $\sigma_a = 0.001$ .

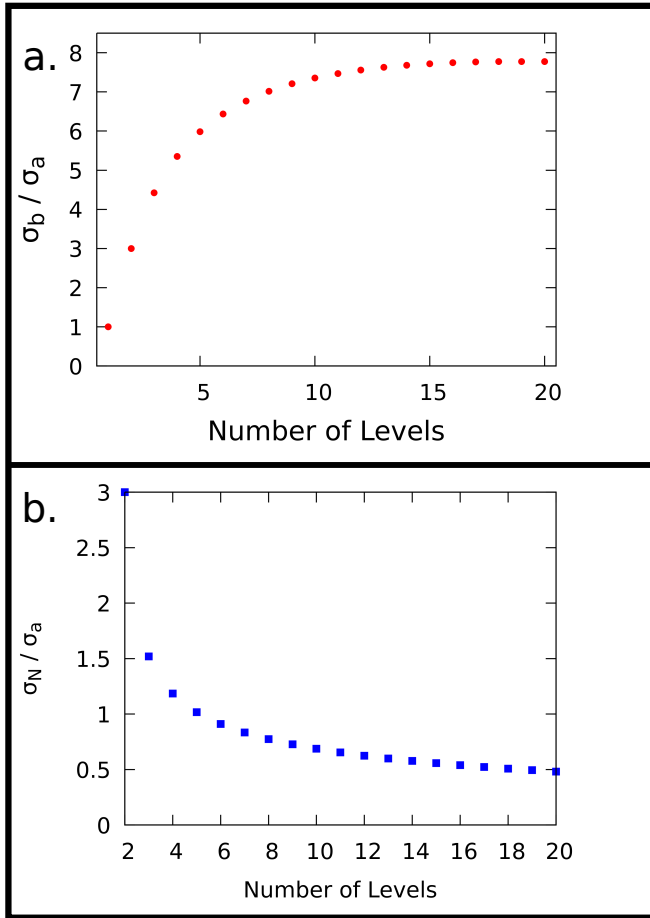

**Fig. S2.** **a.** The ratio of the standard deviation of bond portion on the 'new' level to the standard deviation of bond portion for the 'original' hierarchical levels at which the variation in stiffness of the new structure is equal to the variation in stiffness of the one level structure. The new level can always be assembled with a higher variation in bond portion. The effect saturates at a large number of levels, and allows for a striking amount of imprecision in assembly. **b.** The ratio of the standard deviation of the  $N$ th level to that of the other  $N - 1$  levels, such that adding the  $N$ th level does not increase the relative variation in stiffness.

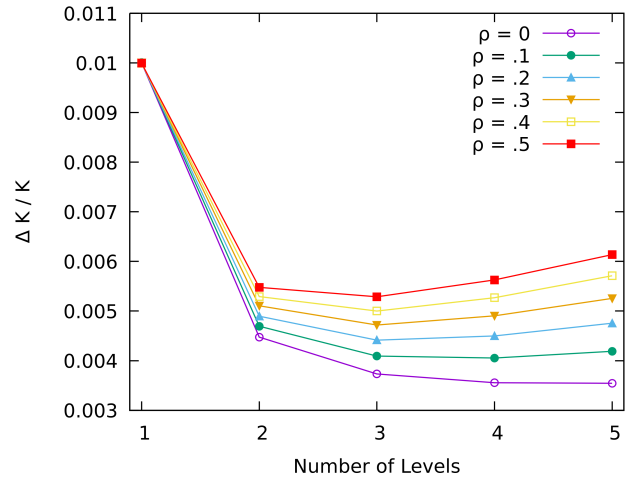

**Fig. S3.** The relative error is plotted against the number of hierarchical levels for cases in which the product of excess bond portions is 0.1, and the diagonal elements of the covariance matrix are  $10^{-6}$ , and  $\rho$  is varied from 0.0 to 0.5.

We also consider the case in which the errors in bond portion on different structural levels are identically distributed, but correlated. For a network with  $N$  structural levels, we consider an  $N \times N$  covariance matrix  $\Sigma$  which takes the form

$$\Sigma_{i,j} = \begin{cases} \sigma^2, & i = j \\ \rho\sigma^2, & i \neq j \end{cases} \quad [\text{S31}]$$

It can be shown that

$$|\Sigma| = \sigma^N [1 + (N - 1)\rho] (1 - \rho)^{N-1}$$

In this case, the probability distribution function for a vector of bond portion errors  $\vec{\delta}$  is given by

$$\mathcal{P}(\vec{\delta}) = \frac{1}{(2\pi)^{N/2} |\Sigma|} \exp \left[ -\frac{1}{2} \vec{\delta}^T \Sigma^{-1} \vec{\delta} \right] \quad [\text{S32}]$$

To illustrate this point, we show a plot of relative error in stiffness vs. number of levels, with fixed  $\sigma$  and varying coupling strength  $\rho$  (Fig. S3). While large correlations between errors eventually cause  $\frac{\Delta K}{K}$  to increase, we find that having more than one level of structure always decreases  $\frac{\Delta K}{K}$ .

In view of the results of these alternative investigations, we anticipate that protection against fluctuation in stiffness is a generic benefit of structural hierarchy, and does not depend sensitively on the precise details of the distribution of errors in assembly.

**Varying the Large-Scale Bond Length and Width.** Our model is liable to fail if the width of a large-scale bond is either too great or too small in comparison with the length of the bond. We first consider the case in which bonds are too wide; here, the network ceases to behave as a structure with two, disparate length scales, and appears more like a sheet with small perforations. This is because our hierarchical networks may be viewed as single-scale triangular lattices with holes removed from them. It may be shown that, for large bonds of length  $l$  and width  $w$ , each of these holes is an equilateral triangle with side length  $s$  given by

$$s = l - w\sqrt{3} \quad [\text{S33}]$$

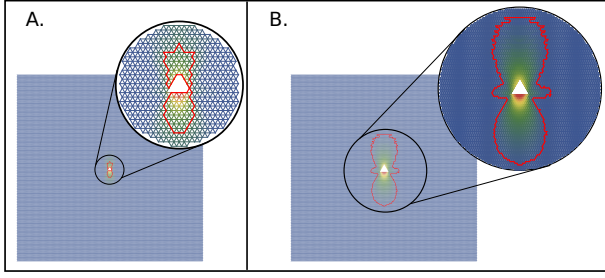

**Fig. S4.** The discrepancy between the displacement fields with and without a hole for **a.** a hole of length 5 and **b.** a hole of length 10. Here, we show annular sections taken from networks with overall dimensions of 200 by 200 bonds.

131 If each small bond has a length  $a$ , large bonds are  $n_l$  small  
 132 bonds long, and large bonds have  $r$  rows of small-scale bonds,  
 133 Eq. (S33) is equivalent to

$$s = a \left[ n_l - \frac{3(r-1)}{2} \right] \quad [\text{S34}]$$

135 We now seek the region over which the addition of a hole  
 136 to an otherwise unbroken sheet has an appreciable affect upon  
 137 the displacement field of a sheet under tensile strain, with  
 138 the top and bottom pinned in the  $y$  direction, but free to  
 139 relax in the  $x$  direction. We begin with a reference network,  
 140 with overall dimensions of 200 by 200, in units of small-scale  
 141 bond length, with no hole, and apply a strain of 0.05% in the  
 142 vertical direction. We then apply this same strain to networks  
 143 with holes in their centers, with hole side lengths varying from  
 144 2 to 15, in units of small-scale bond length. In each case, we  
 145 subtract the displacement field at each point in the reference  
 146 network from the displacement field in a network with a hole,  
 147 omitting those points removed by the formation of the hole.

148 In seeking the region within which a hole has appreciably  
 149 altered the mechanics of the network, we apply the following  
 150 criterion: if the magnitude of the discrepancy between the  
 151 displacement field in the presence of a hole and the displac-  
 152 ment field in the absence of the hole is at least the applied  
 153 strain times the small-scale bond length, the point lies within  
 154 the “region of influence” of the hole. That is, if  $\vec{u}_{ref}$  is the  
 155 reference displacement field,  $\vec{u}_{hole}$  is the displacement field  
 156 with the hole, and  $\varepsilon$  is the applied strain, then

$$|\vec{u}_{hole} - \vec{u}_{ref}| \geq \varepsilon a \quad [\text{S35}]$$

158 where  $\varepsilon a$  is the approximate elongation of a small-scale  
 159 bond in a perfectly affinely deformed network with overall  
 160 strain  $\varepsilon$ . Below, we show two cases: a deformed network with  
 161 a hole of length 5, and a deformed network with a hole of  
 162 length 10. Networks are colored to show the magnitude of the  
 163 discrepancy between the displacement fields in the networks  
 164 with and without the hole, and the boundary of the holes  
 165 region of influence is shown with a bold, red stroke (Fig S4).

166 While the region of influence is modest for small hole size,  
 167 the region of influence for large hole size is considerable. To set  
 168 a standard for widest acceptable width, given a certain length,  
 169 we calculate the maximum difference from the center of the  
 170 hole to a point on the perimeter of the center of influence. We  
 171 denote this distance by  $r_{max}$ . For the lattices we consider, the  
 172 center-to-center separation of holes of length  $l$ , separated by a  
 173 single large-scale bond, is  $\frac{l}{\sqrt{3}}$ . Therefore, the size of the region

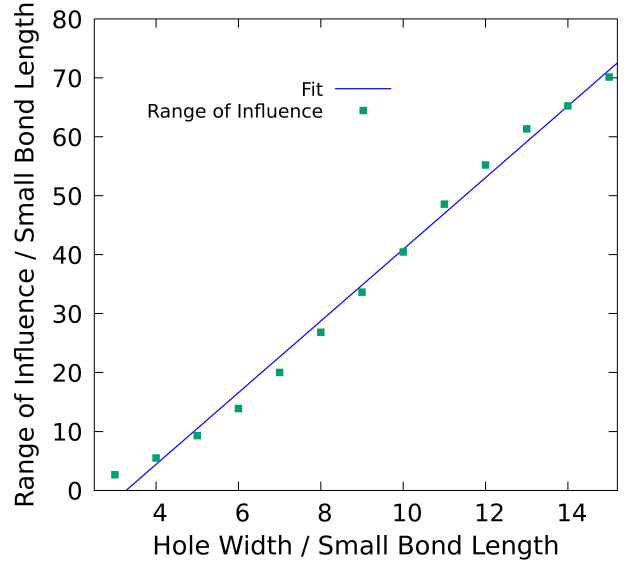

**Fig. S5.** Region of influence size vs. the width of a hole placed in the center of the network.

of influence of a hole should be comparable to or greater than  
 this length. We find that, for holes with side length  $s$  of 3 or  
 greater, in units of small-scale bond length,  $r_{max}$  is roughly  
 linear with hole size:

$$r_{max} \approx 5.6s - 15 \quad [\text{S36}]$$

with  $r^2 = 0.99$ . This demands

$$\frac{l}{\sqrt{3}} \leq 5.6s - 15 \quad [\text{S37}]$$

$$\frac{l}{\sqrt{3}} \leq 5.6(l - w\sqrt{3}) - 15 \quad [\text{S38}]$$

or

$$l - 2w \gtrsim 3 \quad [\text{S39}]$$

We show data in Fig S5. While we have chosen to study  
 networks in which springs have a stiffness of one, in units  
 of one-dimensional stretching modulus over small-scale bond  
 length, the equilibrium configurations of networks in their  
 strained states would remain equilibrium configurations for  
 the same loading conditions if the stiffness of each spring  
 were re-scaled by the same multiplicative factor. We therefore  
 find that the foregoing considerations should be of general  
 applicability.

On the other hand, a bond may also be too narrow. Our  
 analysis is sure to fail if large-scale bonds are only one or two  
 bonds wide. In this case, the connectivity at the small scale  
 is less than or equal to 4, and so the removal of even a small  
 fraction of small-scale bonds will immediately destabilize the  
 network. Further, overly narrow large-scale bonds will be  
 highly susceptible to bending, which invalidates our picture of  
 a primarily stretching-stabilized structure. In general, a thin  
 rod of length  $l$ , with Young’s modulus  $E$ , becomes unstable  
 to buckling along direction  $\hat{x}$  under a load

$$F_{cr} \propto \frac{EI}{l^2} \quad [\text{S40}]$$



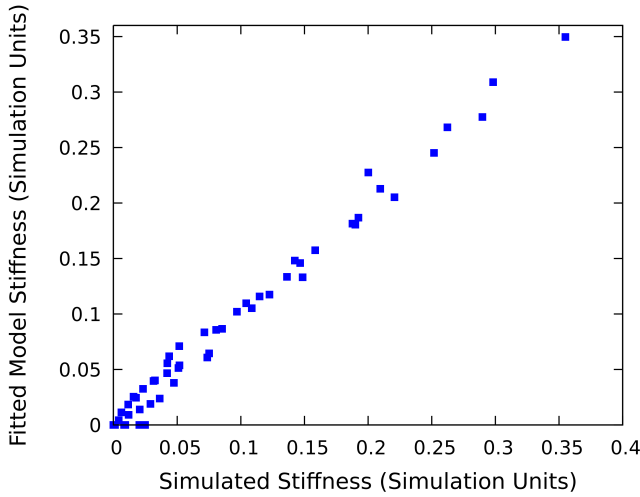

**Fig. S6.** Model vs. simulated stiffness values for a two-level network with large-scale bonds that are 5 rows wide and 20 small-scale bonds long.

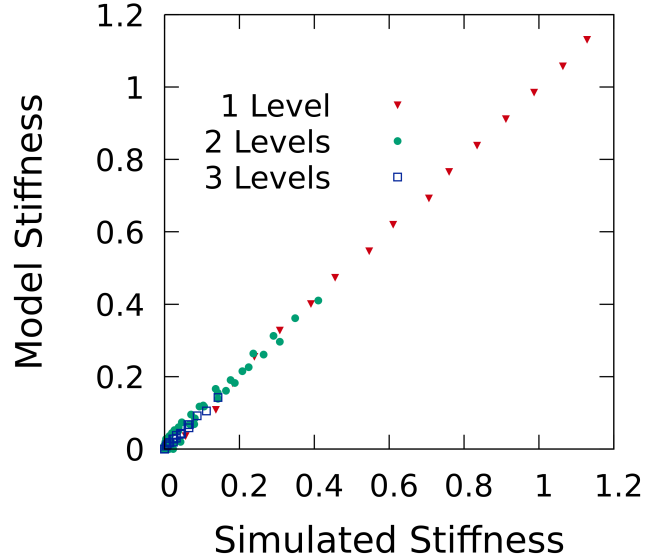

**Fig. S7.** Non-normalized stiffness values from the scaling model and simulation are compared. Despite the difference in maximum attainable stiffness, the same trend of strong agreement between model and simulation data is observed.

with

$$I = \int x^2 dA \quad [\text{S41}]$$

where the integral is over the cross section of the rod. (1)  
In two dimensions, for a rod of width  $w$ ,

$$I = \frac{w^3}{12} \quad [\text{S42}]$$

The prefactor in Eq. (S40) depends upon the precise boundary conditions at the ends of the rod, and is of order unity. On the other hand, we note that the network will generically contract in the direction transverse to applied tensile strain. Given a Young's modulus  $E$  for a large scale bond, a strain  $\varepsilon$  will lead to a force

$$F = wE\varepsilon \quad [\text{S43}]$$

In all, Eq. (S40), Eq. (S42), and Eq. (S43) suggest bending will become a concern when

$$\frac{Ew^3}{l^2} \sim wE\varepsilon \quad [\text{S44}]$$

or

$$\frac{l}{w} \sim \varepsilon^{-1/2} \quad [\text{S45}]$$

We have also conducted an additional investigation to confirm that our model captures simulation results when the length and width of large-scale bonds relative to small-scale bonds are varied. We produced two-level networks in which each large-scale bond had five rows of small-scale bonds, and a length of twenty small-scale bonds. As in previous simulations, we varied both the small and large-scale bond portions from 0.55 to 1.0 in increments of 0.05, and as before, we found that our model captured simulation results. A plot of model prediction vs. simulation result for the 100 cases considered is linear, with a slope of 0.995, and an  $r^2$  value of 0.991. Data are shown in Fig. S6.

**Non-normalized Comparison of Simulation and Model.** In the main text, Fig. 2e shows a comparison of the model vs. the simulation stiffness values for networks with one-, two- and three-hierarchical levels, in which we normalized the stiffness value of a network with  $N$  levels by dividing that stiffness by the maximum attainable stiffness for an  $N$  level network. As before, stiffness units are the one-dimensional stretching modulus  $\mu$  used in Eq. 5 in the main text, divided by the length of a small-scale bond. In Fig. S7, we show a modified version of Fig. 2e, in which stiffness values are not normalized. Notably, the maximum attainable stiffness decreases with the number of hierarchical levels, as the maximum density of small-scale units decreases significantly. Nevertheless, agreement between the simulation results and scaling model remains strong for each class of network considered, and within the range of stiffness values attainable, more hierarchical networks offer more reliability with less material used.

**Assessing Stiffness Distributions for Differing Target Stiffness and Noise Values.** In the main text, we discussed numerical trials in which we produced interpolating functions to predict the stiffnesses of hierarchical networks with specified bond portions on each scale, found combinations that would yield a desired, soft stiffness, and added zero-mean, Gaussian random noise to each bond portion over 50,000 trials. We found that the distribution of stiffness became progressively narrower with increasing levels of structural hierarchy. To assess the robustness of this effect, we have considered a range of stiffness values and noise standard deviations. Below, we show the results of the procedure described above in which stiffness values range from 0.02 to 0.05, in simulation units (for which the stretching stiffness of an individual bond is unity), and the standard deviation of noise added to bond portions varies from 0.005 to 0.001. We show heat maps for networks with one, two and three levels of structure, in which the mean absolute value of the difference between actual and target

266 stiffness, normalized by the target stiffness, is plotted vs. the  
267 standard deviation of noise and target stiffness (Fig. S8). In  
268 all cases we find that increasing the number of hierarchical  
269 levels, increasing the target stiffness, and decreasing the noise  
270 all decrease the error in stiffness.

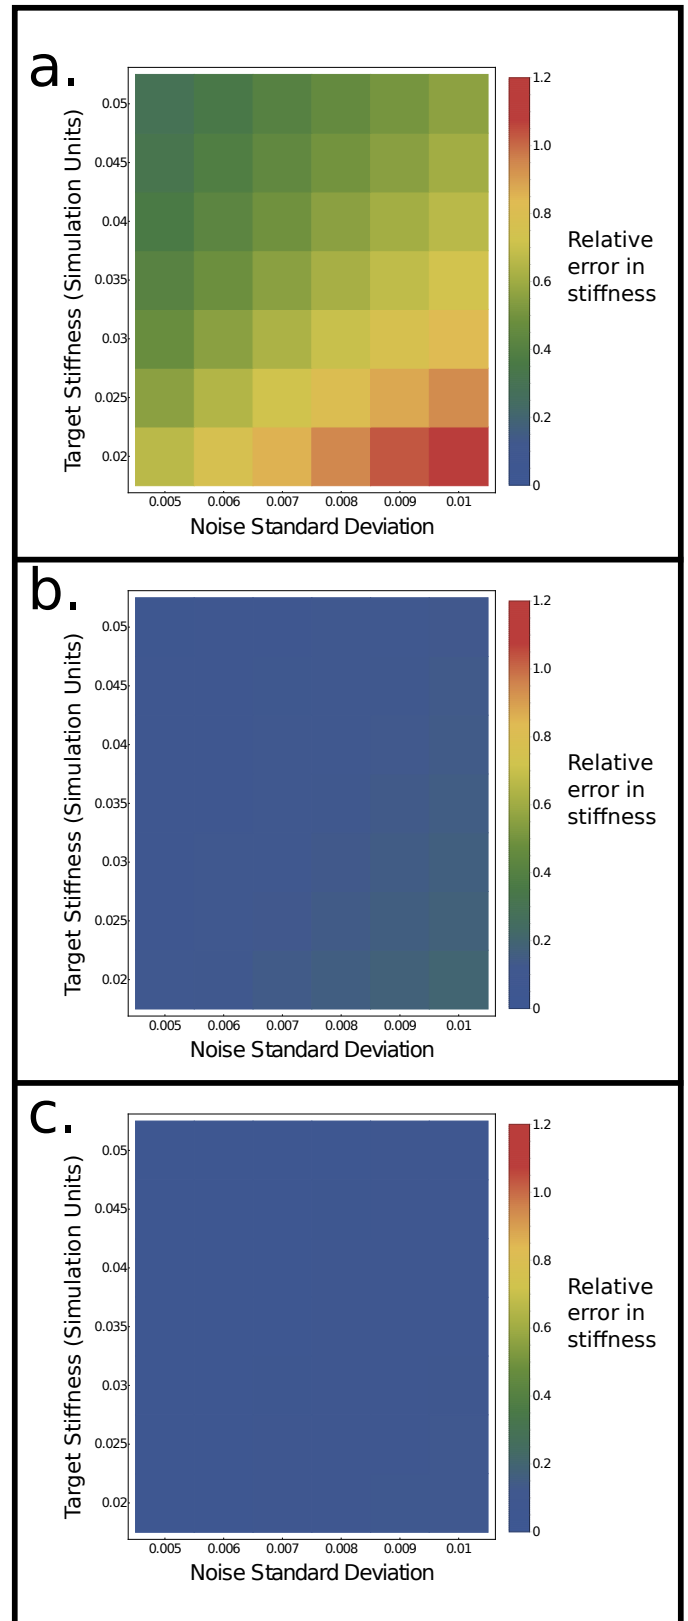

**Fig. S8.** Mean absolute value of deviation from target stiffness, normalized by target stiffness for **a** a network with one level of structure, **b** a network with two levels of structure, and **c** a network with three levels of structure.

271 1. Landau, L. D. and Lifshitz, E. M. *Theory of Elasticity, Second Edition* (Pergamon Press, Ox-  
272 ford), pp. 97-98.
